# Supplementary material for: Modeling the two-locus architecture of divergent pollinator adaptation: how variation in SAD paralogs affects fitness and evolutionary divergence in sexually deceptive orchids
Source: PubMed Central journal article supplement (PMC4314279; doi:10.1002/ece3.1378), 2015-01-04
Supplement: ece30005-0493-sd2.pdf [file ece30005-0493-sd2.pdf]

| Genotype           |              | Relative <i>SAD</i> expression |              | Predicted total amount of alkene class (ng) |          |           | Predicted relative pollinator attraction |           |       |
|--------------------|--------------|--------------------------------|--------------|---------------------------------------------|----------|-----------|------------------------------------------|-----------|-------|
| <i>SAD2A</i>       | <i>SAD5A</i> | <i>SAD2A</i>                   | <i>SAD5A</i> | Total Z7                                    | Total Z9 | Total Z12 | <i>An</i>                                | <i>Cc</i> |       |
| <b>SUS Absent</b>  | ++           | --                             | 0.45         | 0.01                                        | 121.47   | 598.25    | 323.33                                   | 101.79    | 4.03  |
|                    | +-           | --                             | 0.23         | 0.01                                        | 117.68   | 375.03    | 152.68                                   | 95.54     | 10.26 |
|                    | ++           | +-                             | 0.45         | 0.21                                        | 735.78   | 590.01    | 76.16                                    | 27.90     | 23.44 |
|                    | --           | --                             | 0.01         | 0.01                                        | 116.41   | 163.41    | 40.42                                    | 32.70     | 38.10 |
|                    | +-           | +-                             | 0.23         | 0.21                                        | 725.18   | 379.29    | 45.26                                    | 29.29     | 39.58 |
|                    | ++           | ++                             | 0.45         | 0.40                                        | 2022.11  | 603.08    | 35.57                                    | 10.45     | 34.01 |
|                    | --           | +-                             | 0.01         | 0.21                                        | 703.78   | 167.42    | 28.24                                    | 19.87     | 73.88 |
|                    | +-           | ++                             | 0.23         | 0.40                                        | 1871.42  | 379.55    | 30.50                                    | 13.74     | 58.50 |
| --                 | ++           | 0.01                           | 0.40         | 1894.13                                     | 165.04   | 23.90     | 10.50                                    | 100.69    |       |
| <b>SUS Present</b> | ++           | --                             | 0.45         | 0.01                                        | 119.99   | 587.68    | 320.23                                   | 103.38    | 4.49  |
|                    | ++           | +-                             | 0.45         | 0.01                                        | 116.65   | 588.08    | 339.25                                   | 98.53     | 4.34  |
|                    | ++           | ++                             | 0.45         | 0.01                                        | 112.58   | 586.72    | 336.60                                   | 94.65     | 4.42  |
|                    | +-           | ++                             | 0.23         | 0.01                                        | 118.56   | 386.35    | 159.95                                   | 82.18     | 9.07  |
|                    | +-           | --                             | 0.23         | 0.01                                        | 119.38   | 377.99    | 159.94                                   | 77.38     | 9.21  |
|                    | +-           | +-                             | 0.23         | 0.01                                        | 120.98   | 379.53    | 156.13                                   | 74.57     | 9.44  |
|                    | --           | --                             | 0.01         | 0.01                                        | 120.43   | 165.08    | 39.23                                    | 20.94     | 30.14 |
|                    | --           | +-                             | 0.01         | 0.21                                        | 741.38   | 163.58    | 28.40                                    | 11.89     | 68.98 |
| --                 | ++           | 0.01                           | 0.40         | 1860.14                                     | 164.84   | 23.94     | 6.25                                     | 100.33    |       |

**Individual alkenes (ng)**

| <b>C21-Z7</b> | <b>C23-Z7</b> | <b>C25-Z7</b> | <b>C27-Z7</b> | <b>C21-Z9</b> | <b>C23-Z9</b> | <b>C25-Z9</b> | <b>C27-Z9</b> | <b>C29-Z9</b> | <b>C25-Z12</b> | <b>C27-Z12</b> | <b>C29-Z12</b> | <b>Genotype</b> |                   |
|---------------|---------------|---------------|---------------|---------------|---------------|---------------|---------------|---------------|----------------|----------------|----------------|-----------------|-------------------|
| 29.63         | 34.99         | 48.70         | 8.15          | 15.60         | 38.55         | 227.64        | 242.30        | 74.16         | 65.97          | 142.79         | 114.58         | ++/--           | <b>SUS Absent</b> |
| 28.71         | 33.90         | 47.18         | 7.89          | 9.78          | 24.17         | 142.70        | 151.89        | 46.49         | 31.15          | 67.42          | 54.10          | +/-             |                   |
| 179.50        | 211.94        | 294.98        | 49.36         | 15.38         | 38.02         | 224.50        | 238.96        | 73.14         | 15.54          | 33.63          | 26.99          | ++/+            |                   |
| 28.40         | 33.53         | 46.67         | 7.81          | 4.26          | 10.53         | 62.18         | 66.18         | 20.26         | 8.25           | 17.85          | 14.32          | --/--           |                   |
| 176.91        | 208.88        | 290.73        | 48.65         | 9.89          | 24.44         | 144.32        | 153.62        | 47.02         | 9.23           | 19.99          | 16.04          | +/-             |                   |
| 493.32        | 582.46        | 810.68        | 135.65        | 15.72         | 38.87         | 229.48        | 244.26        | 74.76         | 7.26           | 15.71          | 12.61          | +++             |                   |
| 171.69        | 202.72        | 282.15        | 47.21         | 4.36          | 10.79         | 63.70         | 67.81         | 20.75         | 5.76           | 12.47          | 10.01          | --/+            |                   |
| 456.55        | 539.05        | 750.27        | 125.54        | 9.90          | 24.46         | 144.42        | 153.72        | 47.05         | 6.22           | 13.47          | 10.81          | +/-             |                   |
| 462.09        | 545.59        | 759.37        | 127.07        | 4.30          | 10.64         | 62.80         | 66.84         | 20.46         | 4.88           | 10.56          | 8.47           | --/+            |                   |
| 29.27         | 34.56         | 48.10         | 8.05          | 15.32         | 37.87         | 223.61        | 238.02        | 72.85         | 65.34          | 141.42         | 113.48         | ++/--           |                   |
| 28.46         | 33.60         | 46.77         | 7.83          | 15.33         | 37.90         | 223.77        | 238.18        | 72.90         | 69.22          | 149.81         | 120.22         | ++/+            |                   |
| 27.47         | 32.43         | 45.14         | 7.55          | 15.30         | 37.81         | 223.25        | 237.63        | 72.73         | 68.68          | 148.64         | 119.28         | +++             |                   |
| 28.93         | 34.15         | 47.53         | 7.95          | 10.07         | 24.90         | 147.01        | 156.48        | 47.89         | 32.63          | 70.64          | 56.68          | +/-             |                   |
| 29.12         | 34.39         | 47.86         | 8.01          | 9.85          | 24.36         | 143.83        | 153.09        | 46.86         | 32.63          | 70.63          | 56.68          | +/-             |                   |
| 29.51         | 34.85         | 48.50         | 8.12          | 9.89          | 24.46         | 144.41        | 153.72        | 47.05         | 31.86          | 68.95          | 55.33          | +/-             |                   |
| 29.38         | 34.69         | 48.28         | 8.08          | 4.30          | 10.64         | 62.81         | 66.86         | 20.46         | 8.00           | 17.32          | 13.90          | --/--           |                   |
| 180.87        | 213.55        | 297.23        | 49.74         | 4.26          | 10.54         | 62.24         | 66.25         | 20.28         | 5.80           | 12.54          | 10.07          | --/+            |                   |
| 453.80        | 535.80        | 745.74        | 124.79        | 4.30          | 10.62         | 62.72         | 66.76         | 20.43         | 4.88           | 10.57          | 8.48           | --/+            |                   |
