# Supplementary material for: Modeling the two-locus architecture of divergent pollinator adaptation: how variation in SAD paralogs affects fitness and evolutionary divergence in sexually deceptive orchids
Source: PubMed Central journal article supplement (PMC4314279; doi:10.1002/ece3.1378), 2015-01-04
Supplement: ece30005-0493-sd3.pdf [file ece30005-0493-sd3.pdf]

|                                                  | From genotype |             | To genotype |             | Net increase in pollinator attraction |                        | Average increase in pollinator attraction |                        |
|--------------------------------------------------|---------------|-------------|-------------|-------------|---------------------------------------|------------------------|-------------------------------------------|------------------------|
|                                                  | <i>SAD2</i>   | <i>SAD5</i> | <i>SAD2</i> | <i>SAD5</i> | <i>A. nigroaenea</i>                  | <i>C. cunicularius</i> | <i>A. nigroaenea</i>                      | <i>C. cunicularius</i> |
| <b>Gain of one <i>SAD2</i> functional allele</b> | + -           | --          | ++          | --          | 6.57                                  | 6.23                   | <b>2.9</b>                                | <b>-22.2</b>           |
|                                                  | + -           | + -         | ++          | + -         | -1.39                                 | -16.1                  |                                           |                        |
|                                                  | --            | + -         | + -         | + -         | 9.41                                  | -34.3                  |                                           |                        |
|                                                  | + -           | ++          | ++          | ++          | -3.29                                 | -24.5                  |                                           |                        |
|                                                  | --            | ++          | + -         | ++          | 3.24                                  | -42.2                  |                                           |                        |
| <b>Gaining one <i>SAD5</i> functional allele</b> | --            | + -         | --          | ++          | -9.4                                  | 26.8                   | <b>-36.5</b>                              | <b>21.0</b>            |
|                                                  | + -           | --          | + -         | + -         | -66.2                                 | 29.3                   |                                           |                        |
|                                                  | + -           | + -         | + -         | ++          | -15.5                                 | 18.9                   |                                           |                        |
|                                                  | ++            | --          | ++          | + -         | -73.9                                 | 19.4                   |                                           |                        |
|                                                  | ++            | + -         | ++          | ++          | -17.4                                 | 10.6                   |                                           |                        |
